# Supplementary material for: Grain growth study of perovskite thin films prepared by flash evaporation and its effect on solar cell performance
Source: Royal Society of Chemistry journal article supplement (doi:10.1039/c6ra07549e), 2016-01-01
Supplement: c6ra07549e1.pdf [file c6ra07549e1.pdf]

**Electronic Supplementary Information (ESI) for**  
**Grain growth study of perovskite thin films prepared by flash**  
**evaporation and its effect on the solar cell performance**

Haitao Xu<sup>a</sup>, Yanglin Wu<sup>a</sup>, Fuzong Xu<sup>a</sup>, Jiabin Zhu<sup>a</sup>, Chaowei Ni<sup>a</sup>, Wenzhen Wang<sup>a</sup>,  
Feng Hong<sup>b</sup>, Run Xu<sup>\*a</sup>, Fei Xu<sup>\*b,c</sup>, Jian Huang<sup>a</sup> and Linjun Wang<sup>\*a</sup>

<sup>a</sup> School of Materials Science and Engineering, Shanghai University, 99 Shangda Road, Shanghai 200444, China

<sup>b</sup> SHU-Solar E R&D Lab, Department of Physics, Shanghai Key Laboratory of High Temperature Superconductors, Shanghai University, 99 Shangda Road, Shanghai 200444, China

<sup>c</sup> State Key Laboratory of Surface Physics and of Micro and Nano Photonic Structure (Ministry of Education), Fudan University, 220 Handan Road, Shanghai 200433, China

\* Corresponding Authors; Email: runxu@staff.shu.edu.cn; feixu@staff.shu.edu.cn; ljwang@staff.shu.edu.cn

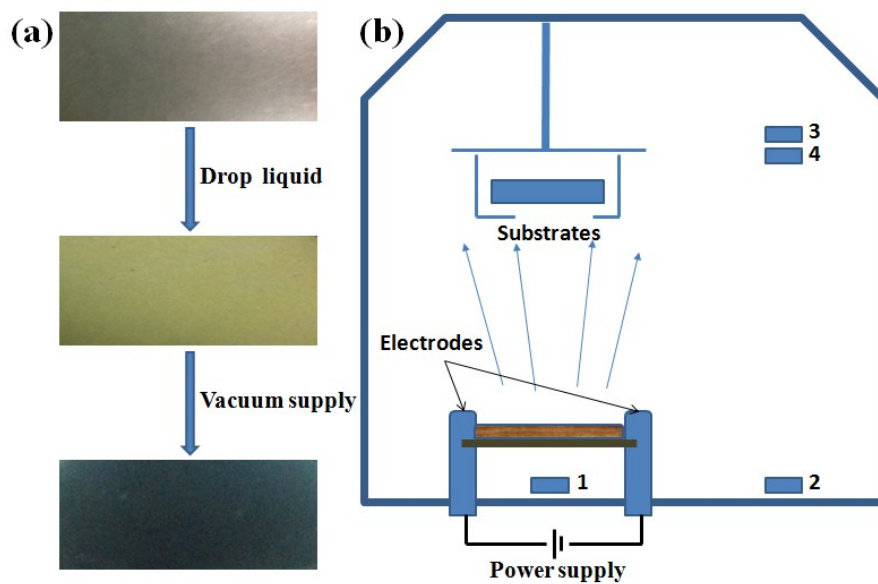

**Fig. S1** Process flow for the deposition of perovskite thin films by flash evaporation. (a) The precursor solution is spread onto a molybdenum foil by dropping equally-distributed liquid and then a polycrystalline film is obtained by solvent evaporation after pumping down the growth chamber. (b) Where the hybrid perovskite is evaporated onto the desired substrates with four pieces. Control Sample 1 is placed by 5 cm right under the molybdenum foil and Control Sample 2 is placed parallel to Control Sample 1 but 20 cm far away from source. Both Control Sample 3 and 4 are placed back to back by 20 cm far away from substrates. Among them, Control Sample 3 faces up and Control Sample 4 faces down.

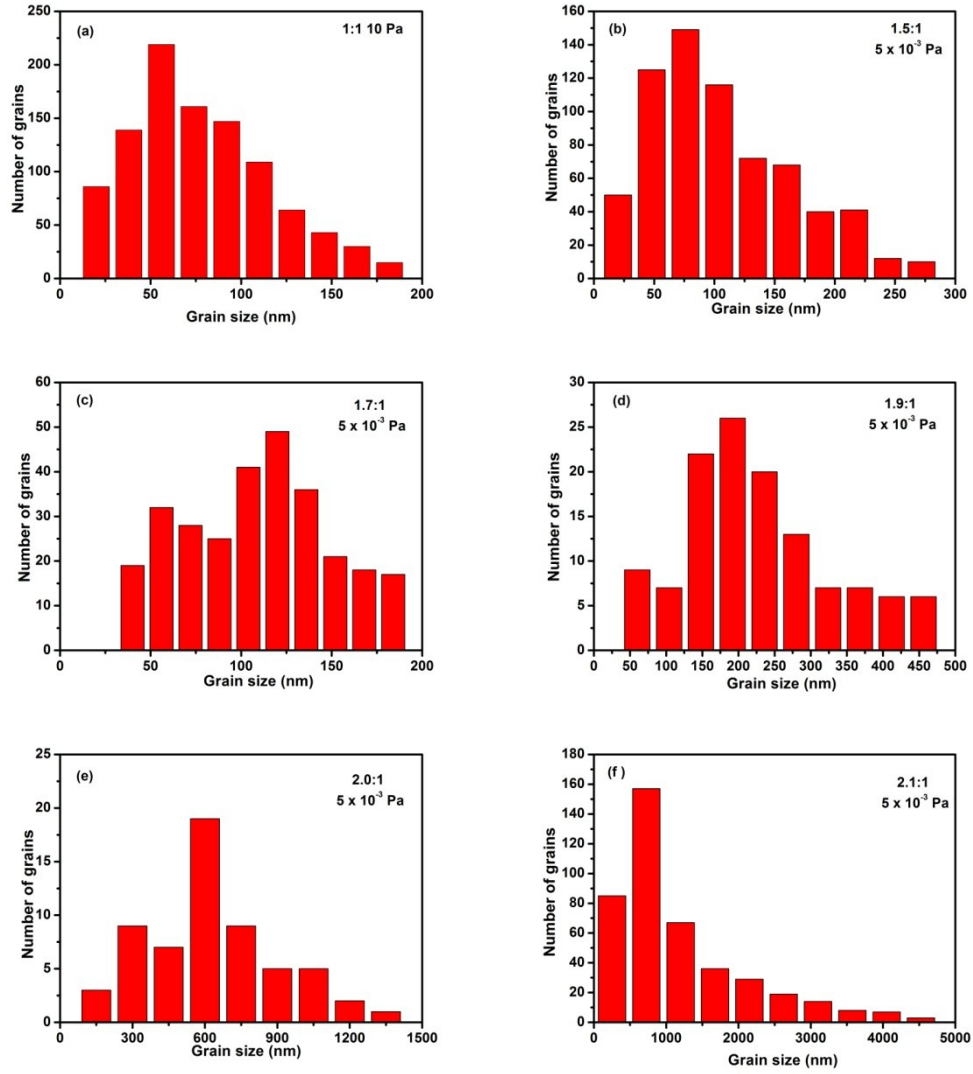

**Fig. S2** (a) A histogram of average MAPbI<sub>3</sub> grain size at a high pressure of 10 Pa. (b) - (f) histograms of average MAPbI<sub>3</sub> grain size at a low pressure of  $5 \times 10^{-3}$  Pa with different molar ratios between MAI and PbI<sub>2</sub>. The ratios are 1.5, 1.7, 1.9, 2.0, 2.1, respectively.

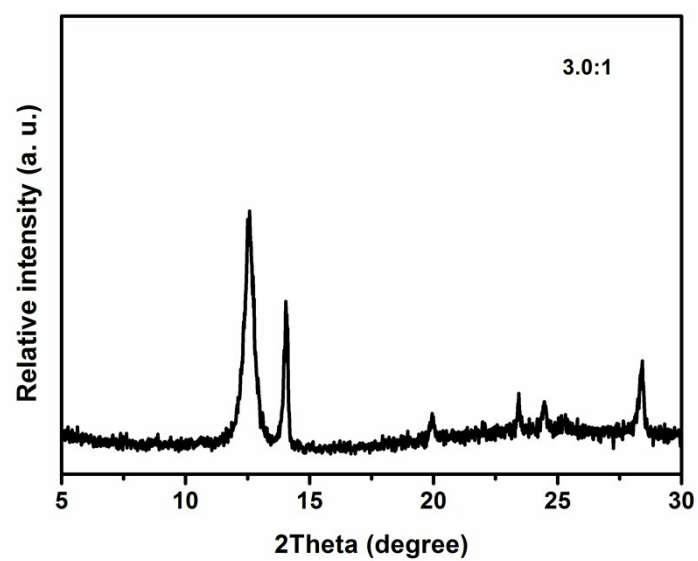

**Fig. S3** X-ray diffraction spectra of films at a low pressure of  $5 \times 10^{-3}$  Pa with increasing current in three minutes.

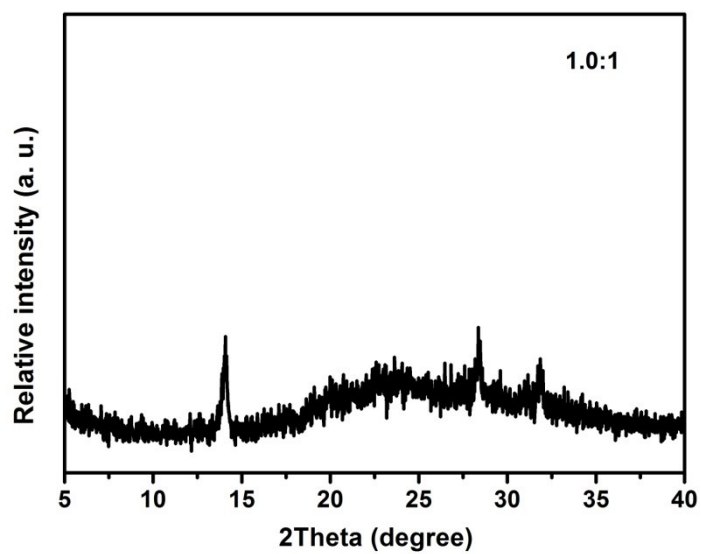

**Fig. S4** X-ray diffraction spectra of the Control Sample 1 of glass which evaporated at a low pressure of 10 Pa.

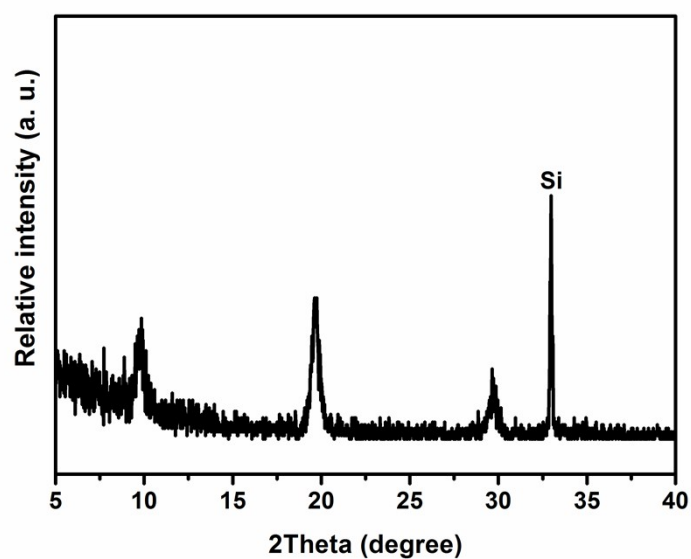

**Fig. S5** X-ray diffraction spectra of a control sample of Si which evaporated at a low pressure of  $5 \times 10^{-3}$  Pa.

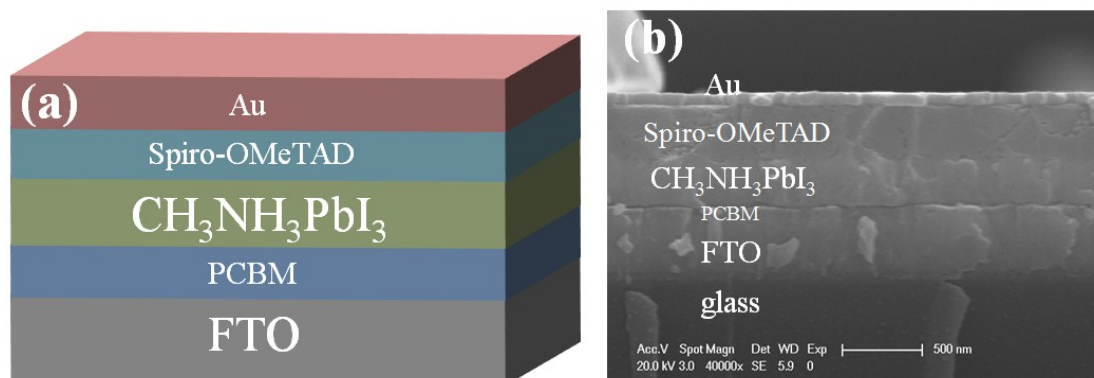

**Fig. S6** (a) Layered structure of a complete solar cell fabricated by flash evaporation. The complete solar cell is a FTO-coated glass substrate, followed by an electron transport layer, a perovskite layer, a hole transport layer, and a top metal contact. (b) Cross-sectional SEM image of the perovskite solar cell.

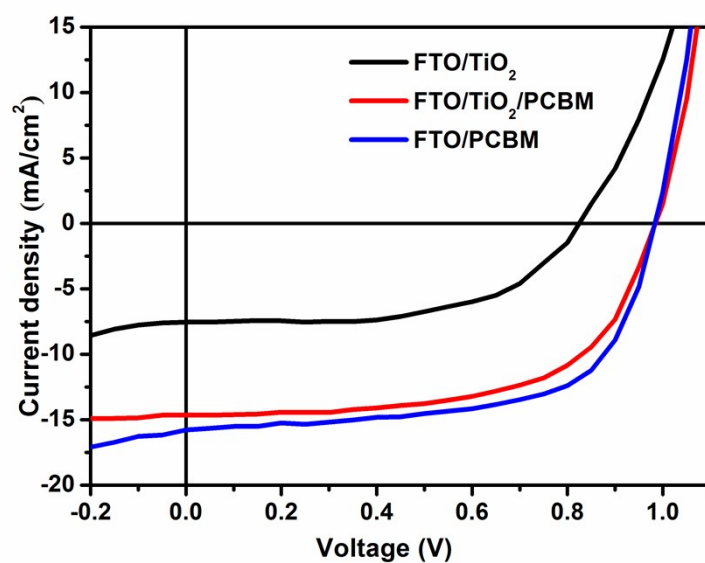

**Fig. S7** Current-density/voltage curves for perovskite solar cells with structure of FTO/TiO<sub>2</sub>/MAPbI<sub>3</sub>/Spiro-OMeTAD/Au, FTO/TiO<sub>2</sub>/PCBM/MAPbI<sub>3</sub>/Spiro-OMeTAD/Au, and FTO/PCBM/MAPbI<sub>3</sub>/Spiro-OMeTAD/Au.

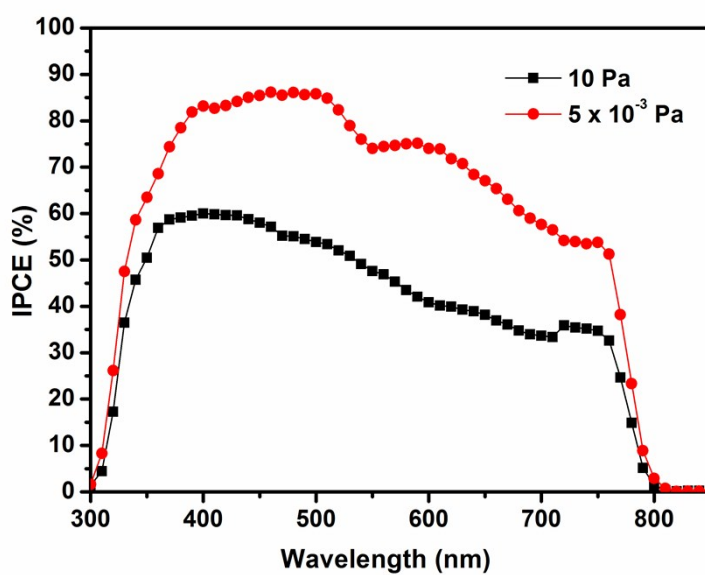

**Fig. S8** IPCE in the UV-visible region for the planar perovskite solar cells with perovskite layer deposited at different pressure.
